# Supplementary material for: Plant density and life history traits of Aconitum spicatum in North-central Nepal: effects of elevation and anthropogenic disturbances
Source: PeerJ. 2019 Sep 10;7:e7574. doi: 10.7717/peerj.7574 (PMC6743441; doi:10.7717/peerj.7574)
Supplement: Appendix S2 [file peerj-07-7574-s005.xlsx]

## Sheet: Adr
Model Selection table for Adult reproductive stage
SN	Models	logLik	AICc	delta	weight
1	glmm.mzip24Adr	-376.42	767.2	0	0.441
2	glmm.mzip23Adr	-376.056	768.6	1.37	0.222
3	glmm.mzip17Adr	-375.599	769.8	2.57	0.122
4	glmm.mzip26Adr	-378.67	771.7	4.5	0.046
5	glmm.mzip18Adr	-375.588	771.9	4.68	0.043
6	glmm.mzip25Adr	-379.055	772.5	5.27	0.032
7	glmm.mzip22Adr	-378.367	773.2	6	0.022
8	glmm.mzip19Adr	-378.016	774.6	7.41	0.011
9	glmm.mzip16Adr	-374.852	774.7	7.5	0.01
10	glmm.mzip11Adr	-380.586	775.5	8.33	0.007
11	glmm.mzip9Adr	-381.908	776.1	8.89	0.005
12	glmm.mzip7Adr	-380.906	776.2	8.97	0.005
13	glmm.mzip15Adr	-379.989	776.4	9.24	0.004
14	glmm.mzip8Adr	-382.098	776.5	9.27	0.004
15	glmm.mzip14Adr	-380.147	776.7	9.56	0.004
16	glmm.mzip2Adr	-383.524	777.2	10.05	0.003
17	glmm.mzip6Adr	-381.462	777.3	10.08	0.003
18	glmm.mzip21Adr	-381.506	777.4	10.17	0.003
19	glmm.mzip12Adr	-381.568	777.5	10.3	0.003
20	glmm.mzip13Adr	-381.575	777.5	10.31	0.003
21	glmm.mzip5Adr	-380.681	777.8	10.62	0.002
22	glmm.mzip10Adr	-379.725	778	10.82	0.002
23	glmm.mzip3Adr	-382.982	778.2	11.04	0.002
24	glmm.mzip20Adr	-381.117	778.7	11.5	0.001
25	glmm.mzip4Adr	-382.319	779	11.8	0.001
26	glmm.mzip1Adr	-402.014	810.1	42.91	0

## Sheet: Adv
Model Selection table for Adult vegetative stage
SN	Models	logLik	AICc	delta	weight
1	glmm.mzip24Adv	-281.585	577.5	0	0.214
2	glmm.mzip19Adv	-279.825	578.2	0.7	0.151
3	glmm.mzip17Adv	-280.051	578.7	1.15	0.12
4	glmm.mzip23Adv	-281.11	578.7	1.15	0.12
5	glmm.mzip18Adv	-279.593	579.9	2.36	0.066
6	glmm.mzip9Adv	-284.281	580.8	3.31	0.041
7	glmm.mzip2Adv	-285.405	581	3.48	0.038
8	glmm.mzip21Adv	-283.437	581.2	3.71	0.034
9	glmm.mzip11Adv	-283.649	581.6	4.13	0.027
10	glmm.mzip8Adv	-284.819	581.9	4.38	0.024
11	glmm.mzip16Adv	-278.515	582	4.5	0.023
12	glmm.mzip26Adv	-284.209	582.8	5.25	0.016
13	glmm.mzip7Adv	-284.262	582.9	5.35	0.015
14	glmm.mzip6Adv	-284.281	582.9	5.39	0.014
15	glmm.mzip3Adv	-285.401	583.1	5.54	0.013
16	glmm.mzip22Adv	-283.382	583.2	5.69	0.012
17	glmm.mzip20Adv	-283.436	583.3	5.8	0.012
18	glmm.mzip15Adv	-283.524	583.5	5.98	0.011
19	glmm.mzip13Adv	-284.672	583.7	6.17	0.01
20	glmm.mzip14Adv	-283.64	583.7	6.21	0.01
21	glmm.mzip12Adv	-284.804	584	6.44	0.009
22	glmm.mzip25Adv	-284.841	584	6.51	0.008
23	glmm.mzip5Adv	-284.26	585	7.45	0.005
24	glmm.mzip4Adv	-285.361	585.1	7.55	0.005
25	glmm.mzip10Adv	-283.502	585.6	8.05	0.004
26	glmm.mzip1Adv	-309.068	624.2	46.69	0

## Sheet: Jv
Model Selection table for Juvenile stage
SN	Models	logLik	AICc	delta	weight
1	glmm.mzip9Juv	-156.049	324.4	0	0.164
2	glmm.mzip21Juv	-155.033	324.4	0.06	0.16
3	glmm.mzip19Juv	-153.536	325.6	1.28	0.087
4	glmm.mzip17Juv	-153.538	325.6	1.28	0.087
5	glmm.mzip11Juv	-155.806	326	1.6	0.074
6	glmm.mzip6Juv	-156.029	326.4	2.05	0.059
7	glmm.mzip20Juv	-155.009	326.5	2.11	0.057
8	glmm.mzip22Juv	-155.029	326.5	2.15	0.056
9	glmm.mzip15Juv	-155.068	326.6	2.23	0.054
10	glmm.mzip5Juv	-155.119	326.7	2.33	0.051
11	glmm.mzip18Juv	-153.534	327.8	3.4	0.03
12	glmm.mzip14Juv	-155.786	328	3.66	0.026
13	glmm.mzip10Juv	-155.054	328.7	4.31	0.019
14	glmm.mzip24Juv	-157.316	329	4.62	0.016
15	glmm.mzip23Juv	-156.368	329.2	4.83	0.015
16	glmm.mzip2Juv	-159.663	329.5	5.15	0.012
17	glmm.mzip8Juv	-159.325	330.9	6.55	0.006
18	glmm.mzip16Juv	-152.995	331	6.62	0.006
19	glmm.mzip25Juv	-158.394	331.1	6.78	0.006
20	glmm.mzip3Juv	-159.662	331.6	7.22	0.004
21	glmm.mzip13Juv	-158.756	331.9	7.5	0.004
22	glmm.mzip4Juv	-158.884	332.1	7.76	0.003
23	glmm.mzip12Juv	-159.323	333	8.64	0.002
24	glmm.mzip1Juv	-164.968	336	11.65	0
25	glmm.mzip26Juv	-284.209	582.8	258.41	0
26	glmm.mzip7Juv	-284.262	582.9	258.51	0

## Sheet: Sd
Model Selection table for Seedling stage
SN	Moels	logLik	AICc	delta	weight
1	glmm.mzip6Sd	-116.934	248.2	0	0.168
2	glmm.mzip14Sd	-115.898	248.2	0.03	0.165
3	glmm.mzip5Sd	-116.293	249	0.82	0.111
4	glmm.mzip10Sd	-115.512	249.6	1.37	0.084
5	glmm.mzip7Sd	-117.758	249.9	1.65	0.074
6	glmm.mzip9Sd	-118.967	250.2	1.98	0.062
7	glmm.mzip19Sd	-115.817	250.2	1.98	0.062
8	glmm.mzip20Sd	-116.929	250.3	2.09	0.059
9	glmm.mzip11Sd	-118.152	250.7	2.43	0.05
10	glmm.mzip15Sd	-117.247	250.9	2.73	0.043
11	glmm.mzip26Sd	-118.775	251.9	3.68	0.027
12	glmm.mzip18Sd	-115.74	252.2	3.95	0.023
13	glmm.mzip21Sd	-118.93	252.2	3.99	0.023
14	glmm.mzip17Sd	-116.869	252.3	4.08	0.022
15	glmm.mzip16Sd	-114.138	253.3	5.04	0.013
16	glmm.mzip22Sd	-118.753	254	5.74	0.01
17	glmm.mzip12Sd	-122.05	258.4	10.23	0.001
18	glmm.mzip3Sd	-123.248	258.8	10.54	0.001
19	glmm.mzip24Sd	-122.266	258.9	10.66	0.001
20	glmm.mzip4Sd	-122.427	259.2	10.98	0.001
21	glmm.mzip23Sd	-122.266	261	12.76	0
22	glmm.mzip13Sd	-123.448	261.2	13.03	0
23	glmm.mzip8Sd	-124.543	261.3	13.13	0
24	glmm.mzip2Sd	-125.583	261.4	13.14	0
25	glmm.mzip25Sd	-124.75	263.8	15.63	0
26	glmm.mzip1Sd	-129.864	265.8	17.58	0
